# Supplementary material
Source: Research Square preprint supplement (doi:10.21203/rs.3.rs-9534809/v1)
Supplement: Supplementary file 1 [file 26ad45a0de0d1628c8c800e6.xlsx]

## Sheet: Sheet1
Yeast assemblages in the ectomicrobiome of Queensland fruit fly and their impact on Metarhizium anisopliae
Journal of Pest Science
Madita Prince1,3*, Francesco Martoni2,3, Tim Sawbridge2,3, John Paul Cunningham2,3, Aimee C. McKinnon2,3
1Agriculture Victoria, Tatura SmartFarm, Tatura, Victoria, Australia
2Agriculture Victoria, AgriBio Centre for AgriBiosciences, Bundoora, Victoria, Australia
3School of Applied Systems Biology, La Trobe University, Melbourne, Victoria, Australia
madita.prince@agriculture.vic.gov.au ; maditaprince_@hotmail.com
Supplementary Table 3: Fungal taxa found in the wild Qfly-infested and non-infested fruit juice samples and their inoculated larval ectomicrobiome. Fungal taxa with reads above 100 included.
Wild Qfly-infested fruit		Non-infested fruit
Fruit juice	Larval ectomicrobiome	Fruit juice	Larval ectomicrobiome
	Alternaria sp. 1	Alternaria sp. 1	Alternaria sp. 1
	Alternaria subcucurbitae		Aspergillus sp. 1
	Alutaceodontia alutacea		Aspergillus sp. 2, 4
Aspergillus sp. 1	Aspergillus sp. 1	Aureobasidium sp.	Aureobasidium sp.
Aspergillus carbonarius			Bionectriaceae
	Apiotrichum xylopini		Botryobasidium subcoronatum
Aureobasidium sp.	Aureobasidium sp.	Buckleyzyma sp.
Bisifusarium sp.	Bisifusarium sp.	Buckleyzyma aurantiaca	Buckleyzyma aurantiaca
	Candida tropicalis		Candida tropicalis
	Cladosporium sp. 1		Ceraceomyces sp.
	Cladosporium sp. 4		Ceratobasidium sp.
	Cladosporium sphaerospermum	Cladosporium sp. 1	Cladosporium sp. 1
Curvibasidium cygneicollum		Cladosporium sp. 2
Curvibasidium nothofagi	Curvibasidium nothofagi		Cladosporium sp. 3
	Cystofilobasidium macerans		Cladosporium halotolerans
Didymellaceae 2	Didymellaceae 2		Cladosporium sphaerospermum
	Didymellaceae 3	Claviceps sp.
	Diutina neorugosa		Coprinellus xanthothrix
	Epicoccum italicum	Curvibasidium nothofagi
	Fomitopsis pinicola		Curvularia xishuangbannaensis
	Fusarium sp. 1		Cylindrobasidium evolvens
Fusarium sp. 2	Fusarium sp. 2	Cystobasidium sp. 1
	Ganoderma applanatum		Debaryomyces sp.
	Geotrichum sp.	Didymosphaeria variabile
Geotrichum candidum	Geotrichum candidum		Dioszegia crocea
Hanseniaspora sp. 1, 3	Hanseniaspora sp. 1, 3	Dissoconium sp.
Hanseniaspora sp. 2	Hanseniaspora sp. 2	Efibula tuberculata
Hanseniaspora guilliermondii	Hanseniaspora guilliermondii	Entyloma sp. 1	Entyloma sp. 1
Hanseniaspora lachancei	Hanseniaspora lachancei	Entyloma calendulae	Entyloma calendulae
Issatchenkia orientalis		Epicoccum italicum	Epicoccum italicum
Kluyveromyces marxianus	Kluyveromyces marxianus	Erythrobasidium sp. 1	Erythrobasidium sp. 1
	Kuehneromyces mutabilis	Erythrobasidium sp. 2
	Kwoniella sp. 1		Eutypa sp.
	Linnemannia gamsii		Exidiaceae
	Lophiostoma sp. 1	Fomitopsis pinicola	Fomitopsis pinicola
	Meyerozyma guilliermondii		Gymnopus sp. 1
	Mortierella alpina		Gymnopus androsaceus
	Peniophoraceae 1		Gymnopus dryophilus
	Phaeolus schweinitzii		Hanseniaspora sp. 2
Pichia myanmarensis	Pichia myanmarensis		Hanseniaspora guilliermondii
Pichia terricola	Pichia terricola		Hanseniaspora lachancei
Plectosphaerella sp.	Plectosphaerella sp.		Heterobasidion sp.
	Purpureocillium sp.		Hyphoderma setigerum
	Resinicium bicolor		Hyphodontia pallidula
Schwanniomyces occidentalis	Schwanniomyces occidentalis		Itersonilia pannonica
	Simplicillium sp.		Kluyveromyces marxianus
	Sporobolomyces roseus		Leptospora sp.
	Trichothecium roseum		Leptospora hydei
Vishniacozyma victoriae	Vishniacozyma victoriae		Maireina sp.
	Wickerhamomyces anomalus		Merulicium fusisporum
Wickerhamomyces pijperi	Wickerhamomyces pijperi		Meyerozyma guilliermondii
			Mycena sp. 1
			Mycena sp. 2
			Mycena sanguinolenta
			Naganishia sp.
		Neoascochyta sp. 1	Neoascochyta sp. 1
			Nigrospora sp. 1
		Pallidophorina paarla	Pallidophorina paarla
		Paraconiothyrium brasiliense
			Papiliotrema flavescens
		Penicillium sp. 2
			Peniophora sp. 1
			Peniophora sp. 4
			Peniophoraceae 1
			Peniophoraceae 2
			Peniophorella sp. 1
			Peniophorella praetermissa
			Peniophorella pubera
		Phaeosphaeria sp.	Phaeosphaeria sp.
			Phanerochaete sp.
			Phlebia bresadolae
		Pleosporaceae 1	Pleosporaceae 1
		Podosphaera ampla	Podosphaera ampla
			Polyporus arcularius
		Pseudocamarosporium eucalypti
			Radulomyces sp. 1
			Resinicium bicolor
		Rhodotorula sp.
			Rhodotorula mucilaginosa
			Schizophyllum commune
		Sclerotiniaceae	Sclerotiniaceae
			Scopuloides hydnoides
			Sertulicium vernale
			Sistotrema sp.
			Sporidiobolus salmonicolor
		Sporobolomyces ruberrimus
			Sporobolomyces roseus
		Sporormiaceae
			Steccherinum sp.
		Stemphylium vesicarium
			Stereum rugosum
			Stereum ostrea
		Symmetrospora sp. 1	Symmetrospora sp. 1
		Symmetrospora sp. 2, 3
			Teratosphaeriaceae 1
			Trametes versicolor
			Tranzscheliella yupeitaniae
			Trichosporon sp.
		Verticillium dahliae
		Vishniacozyma carnescens	Vishniacozyma carnescens
		Vishniacozyma victoriae	Vishniacozyma victoriae
			Wallemia sp.
			Wickerhamomyces sp. 1
		Wickerhamomyces anomalus	Wickerhamomyces anomalus
			Zygoascus meyerae
