# Supplementary material
Source: Research Square preprint supplement (doi:10.21203/rs.3.rs-9534809/v1)
Supplement: Supplementary file 2 [file 2cba3fdded3ca4da5ad12d6b.xlsx]

## Sheet: Research raw data
insect inoualtion trt	soil inoculation trt	rep	no. bioassay	total no. pupae	no. adult emerged	no. dead pupae	perc mortality
H2O	Tween 80	1	1	15	14	1	7
H2O	Tween 80	2	1	15	15	0	0
H2O	Tween 80	3	1	15	15	0	0
H2O	Tween 80	4	1	15	15	0	0
H2O	Tween 80	5	1	15	14	1	7
H2O	Tween 80	6	2	15	15	0	0
H2O	Tween 80	7	2	15	15	0	0
H2O	Tween 80	8	2	15	14	1	7
H2O	Tween 80	9	2	15	15	0	0
H2O	Tween 80	10	2	15	15	0	0
H2O	Tween 80	11	3	15	14	1	7
H2O	Tween 80	12	3	15	15	0	0
H2O	Tween 80	13	3	15	15	0	0
H2O	Tween 80	14	3	15	14	1	7
H2O	Tween 80	15	3	15	15	0	0
H2O	MQ1	1	1	15	8	7	47
H2O	MQ1	2	1	15	7	8	53
H2O	MQ1	3	1	15	7	8	53
H2O	MQ1	4	1	15	9	6	40
H2O	MQ1	5	1	15	8	7	47
H2O	MQ1	6	2	15	9	1	7
H2O	MQ1	7	2	15	11	0	0
H2O	MQ1	8	2	15	7	0	0
H2O	MQ1	9	2	15	10	1	7
H2O	MQ1	10	2	15	8	0	0
H2O	MQ1	11	3	15	8	7	47
H2O	MQ1	12	3	15	9	6	40
H2O	MQ1	13	3	15	7	8	53
H2O	MQ1	14	3	15	7	8	53
H2O	MQ1	15	3	15	10	5	33
WI	Tween 80	1	1	15	15	0	0
WI	Tween 80	2	1	15	15	0	0
WI	Tween 80	3	1	15	14	1	7
WI	Tween 80	4	1	15	15	0	0
WI	Tween 80	5	1	15	15	0	0
WI	Tween 80	6	2	15	15	7	47
WI	Tween 80	7	2	15	14	6	40
WI	Tween 80	8	2	15	15	8	53
WI	Tween 80	9	2	15	15	8	53
WI	Tween 80	10	2	15	15	5	33
WI	Tween 80	11	3	15	14	1	7
WI	Tween 80	12	3	15	15	0	0
WI	Tween 80	13	3	15	15	0	0
WI	Tween 80	14	3	15	15	0	0
WI	Tween 80	15	3	15	13	2	13
WI	MQ1	1	1	15	15	0	0
WI	MQ1	2	1	15	8	7	47
WI	MQ1	3	1	15	15	0	0
WI	MQ1	4	1	15	8	7	47
WI	MQ1	5	1	15	15	0	0
WI	MQ1	6	2	15	10	5	33
WI	MQ1	7	2	15	13	2	13
WI	MQ1	8	2	15	10	5	33
WI	MQ1	9	2	15	14	1	7
WI	MQ1	10	2	15	9	6	40
WI	MQ1	11	3	15	10	5	33
WI	MQ1	12	3	15	11	4	27
WI	MQ1	13	3	15	13	2	13
WI	MQ1	14	3	15	13	2	13
WI	MQ1	15	3	15	10	5	33
LI	Tween 80	1	1	15	15	0	0
LI	Tween 80	2	1	15	15	0	0
LI	Tween 80	3	1	15	14	1	7
LI	Tween 80	4	1	15	15	0	0
LI	Tween 80	5	1	15	15	0	0
LI	Tween 80	6	2	15	14	1	7
LI	Tween 80	7	2	15	14	1	7
LI	Tween 80	8	2	15	15	0	0
LI	Tween 80	9	2	15	15	0	0
LI	Tween 80	10	2	15	14	1	7
LI	Tween 80	11	3	15	14	1	7
LI	Tween 80	12	3	15	15	0	0
LI	Tween 80	13	3	15	15	0	0
LI	Tween 80	14	3	15	15	0	0
LI	Tween 80	15	3	15	15	0	0
LI	MQ1	1	1	15	15	0	0
LI	MQ1	2	1	15	15	0	0
LI	MQ1	3	1	15	15	0	0
LI	MQ1	4	1	15	14	1	7
LI	MQ1	5	1	15	14	1	7
LI	MQ1	6	2	15	12	3	20
LI	MQ1	7	2	15	15	0	0
LI	MQ1	8	2	15	14	1	7
LI	MQ1	9	2	15	15	0	0
LI	MQ1	10	2	15	15	0	0
LI	MQ1	11	3	15	14	1	7
LI	MQ1	12	3	15	14	1	7
LI	MQ1	13	3	15	15	0	0
LI	MQ1	14	3	15	15	0	0
LI	MQ1	15	3	15	15	0	0
NI	Tween 80	1	1	15	14	1	7
NI	Tween 80	2	1	15	15	0	0
NI	Tween 80	3	1	15	15	0	0
NI	Tween 80	4	1	15	15	0	0
NI	Tween 80	5	1	15	14	1	7
NI	Tween 80	6	2	15	15	0	0
NI	Tween 80	7	2	15	15	0	0
NI	Tween 80	8	2	15	14	1	7
NI	Tween 80	9	2	15	14	1	7
NI	Tween 80	10	2	15	15	0	0
NI	Tween 80	11	3	15	15	0	0
NI	Tween 80	12	3	15	15	0	0
NI	Tween 80	13	3	15	14	1	7
NI	Tween 80	14	3	15	15	0	0
NI	Tween 80	15	3	15	15	0	0
NI	MQ1	1	1	15	15	0	0
NI	MQ1	2	1	15	15	0	0
NI	MQ1	3	1	15	13	2	13
NI	MQ1	4	1	15	13	2	13
NI	MQ1	5	1	15	13	2	13
NI	MQ1	6	2	15	13	2	13
NI	MQ1	7	2	15	13	2	13
NI	MQ1	8	2	15	11	4	27
NI	MQ1	9	2	15	13	2	13
NI	MQ1	10	2	15	14	1	7
NI	MQ1	11	3	15	13	2	13
NI	MQ1	12	3	15	15	0	0
NI	MQ1	13	3	15	15	0	0
NI	MQ1	14	3	15	13	2	13
NI	MQ1	15	3	15	13	2	13

## Sheet: GLMM parameter table
Yeast assemblages in the ectomicrobiome of Queensland fruit fly and their impact on Metarhizium anisopliae
Journal of Pest Science
Madita Prince1,3*, Francesco Martoni2,3, Tim Sawbridge2,3, John Paul Cunningham2,3, Aimee C. McKinnon2,3
1Agriculture Victoria, Tatura SmartFarm, Tatura, Victoria, Australia
2Agriculture Victoria, AgriBio Centre for AgriBiosciences, Bundoora, Victoria, Australia
3School of Applied Systems Biology, La Trobe University, Melbourne, Victoria, Australia
madita.prince@agriculture.vic.gov.au ; maditaprince_@hotmail.com
Generalised linear mixed model (GLMM) statistical summary of the proportion mortality data on the virulence of Metarhizium anisopliae (MQ1) to Queensland fruit fly larvae exposed to fruit infestation treatments with the following significance codes: 0 '***', 0.01 '**', and 0.1 '-'.
Fruit infestation treatment	EPF treatment	Estimate	Standard error	Z value	P value	Significance code
Intercept		-2.019	0.1851	-10.91	<2e-16	***
H2O	MQ1	1.517	0.1989	7.627	2.41e-14	-
WI	none	6.384e-08	0.2617	0	1	***
WI	MQ1	1.122	0.2047	5.479	4.28e-08	-
LI	none	4.23e-09	0.2617	0	1	-
LI	MQ1	0.1985	0.2426	0.818	0.4132	-
NI	none	1.034e-09	0.2617	0	1	-
NI	MQ1	0.695	0.2158	3.221	0.00128	**
