# Supplementary material
Source: Research Square preprint supplement (doi:10.21203/rs.3.rs-9534809/v1)
Supplement: Supplementary file 3 [file d1c50f28d6cdbcc41e3eb1b5.xlsx]

## Sheet: Sheet1
Yeast assemblages in the ectomicrobiome of Queensland fruit fly and their impact on Metarhizium anisopliae
Journal of Pest Science
Madita Prince1,3*, Francesco Martoni2,3, Tim Sawbridge2,3, John Paul Cunningham2,3, Aimee C. McKinnon2,3
1Agriculture Victoria, Tatura SmartFarm, Tatura, Victoria, Australia
2Agriculture Victoria, AgriBio Centre for AgriBiosciences, Bundoora, Victoria, Australia
3School of Applied Systems Biology, La Trobe University, Melbourne, Victoria, Australia
madita.prince@agriculture.vic.gov.au ; maditaprince_@hotmail.com
Supplementary Table 2: Fungal taxa found in the non-infested fruit as one of the factorial levels of the fruit infestation treatment (A) across the subsequent nested factors: larvae (B) and pupae (C) ectomicrobiome. Fungal taxa with reads above 100 included.
Non-infested fruit
Fruit juice	Larval ectomicrobiome	Pupal ectomicrobiome
Alternaria sp. 1	Alternaria sp. 1	Alternaria sp. 1
	Aspergillus sp. 1	Aspergillus sp. 1
	Aspergillus sp. 2, 4
Aureobasidium sp.	Aureobasidium sp.	Aureobasidium sp.
	Bionectriaceae
	Botryobasidium subcoronatum
Buckleyzyma sp.
Buckleyzyma aurantiaca	Buckleyzyma aurantiaca
	Candida tropicalis
	Ceraceomyces sp.
	Ceratobasidium sp.
Cladosporium sp. 1	Cladosporium sp. 1	Cladosporium sp. 1
Cladosporium sp. 2
	Cladosporium sp. 3
	Cladosporium halotolerans
	Cladosporium sphaerospermum
Claviceps sp.
	Coprinellus xanthothrix
Curvibasidium nothofagi
	Curvularia xishuangbannaensis
	Cylindrobasidium evolvens
Cystobasidium sp. 1
	Debaryomyces sp.
Didymosphaeria variabile
	Dioszegia crocea
Dissoconium sp.
Efibula tuberculata
Entyloma sp. 1	Entyloma sp. 1
Entyloma calendulae	Entyloma calendulae
Epicoccum italicum	Epicoccum italicum	Epicoccum italicum
Erythrobasidium sp. 1	Erythrobasidium sp. 1
Erythrobasidium sp. 2
	Eutypa sp.
	Exidiaceae
Fomitopsis pinicola	Fomitopsis pinicola	Fomitopsis pinicola
	Gymnopus sp. 1
	Gymnopus androsaceus
	Gymnopus dryophilus
	Hanseniaspora sp. 2
	Hanseniaspora guilliermondii
	Hanseniaspora lachancei
	Heterobasidion sp.
	Hyphoderma setigerum	Hyphoderma setigerum
	Hyphodontia pallidula
	Itersonilia pannonica
	Kluyveromyces marxianus
	Leptospora sp.
	Leptospora hydei
	Maireina sp.
	Merulicium fusisporum
	Meyerozyma guilliermondii	Meyerozyma guilliermondii
	Mycena sp. 1
	Mycena sp. 2
	Mycena sanguinolenta
	Naganishia sp.
Neoascochyta sp. 1	Neoascochyta sp. 1
	Nigrospora sp. 1
Pallidophorina paarla	Pallidophorina paarla
Paraconiothyrium brasiliense
	Papiliotrema flavescens
Penicillium sp. 2		Penicillium sp. 2
	Peniophora sp. 1
	Peniophora sp. 4
	Peniophoraceae 1
	Peniophoraceae 2
	Peniophorella sp. 1
	Peniophorella praetermissa
	Peniophorella pubera
Phaeosphaeria sp.	Phaeosphaeria sp.
	Phanerochaete sp.
	Phlebia bresadolae
Pleosporaceae 1	Pleosporaceae 1
Podosphaera ampla	Podosphaera ampla
	Polyporus arcularius
Pseudocamarosporium eucalypti
	Radulomyces sp. 1
	Resinicium bicolor	Resinicium bicolor
Rhodotorula sp.
	Rhodotorula mucilaginosa
	Schizophyllum commune
Sclerotiniaceae	Sclerotiniaceae	Sclerotiniaceae
	Scopuloides hydnoides
	Sertulicium vernale
	Sistotrema sp.
	Sporidiobolus salmonicolor
Sporobolomyces ruberrimus
	Sporobolomyces roseus
Sporormiaceae
	Steccherinum sp.
Stemphylium vesicarium
	Stereum rugosum
	Stereum ostrea
Symmetrospora sp. 1	Symmetrospora sp. 1
Symmetrospora sp. 2, 3
	Teratosphaeriaceae 1
	Trametes versicolor
	Tranzscheliella yupeitaniae
	Trichosporon sp.
Verticillium dahliae		Verticillium dahliae
Vishniacozyma carnescens	Vishniacozyma carnescens
Vishniacozyma victoriae	Vishniacozyma victoriae	Vishniacozyma victoriae
	Wallemia sp.
	Wickerhamomyces sp. 1
Wickerhamomyces anomalus	Wickerhamomyces anomalus	Wickerhamomyces anomalus
	Zygoascus meyerae
