# Supplementary material
Source: Research Square preprint supplement (doi:10.21203/rs.3.rs-9534809/v1)
Supplement: Supplementary file 4 [file f2d1f9e855a82506cf09db33.xlsx]

## Sheet: Sheet1
Yeast assemblages in the ectomicrobiome of Queensland fruit fly and their impact on Metarhizium anisopliae
Journal of Pest Science
Madita Prince1,3*, Francesco Martoni2,3, Tim Sawbridge2,3, John Paul Cunningham2,3, Aimee C. McKinnon2,3
1Agriculture Victoria, Tatura SmartFarm, Tatura, Victoria, Australia
2Agriculture Victoria, AgriBio Centre for AgriBiosciences, Bundoora, Victoria, Australia
3School of Applied Systems Biology, La Trobe University, Melbourne, Victoria, Australia
madita.prince@agriculture.vic.gov.au ; maditaprince_@hotmail.com
Supplementary Table 1: Concentration of viable fungal spores per gram of dry soil of EPF-treated soil and untreated soil of trice-repeated mortality bioassays.
Fruit infestation treatment (A)	EPF soil treatment (C)	Bioassay	Concentration of fungal spores in dry soil g-1
Water control (H2O)	no-inoculum control	1	823
		1	306
		2	939
		2	2840
		3	0
		3	1300
	MQ1	1	679000000
		1	346000000
		2	117000000
		2	56700000
		3	114000000
		3	113000000
Wild Qfly-infested plum juice (WI)	no-inoculum control	1	694
		1	0
		2	3210
		2	654
		3	1110
		3	893
	MQ1	1	535000000
		1	384000000
		2	104000000
		2	52300000
		3	81500000
		3	62500000
Laboratory Qfly-infested plum juice (LI)	no-inoculum control	1	794
		1	1250
		2	0
		2	337
		3	1360
		3	823
	MQ1	1	206000000
		1	529000000
		2	69100000
		2	70700000
		3	88400000
		3	70000000
Non-infested plum juice (NI)	no-inoculum control	1	709
		1	794
		2	2010
		2	763
		3	1180
		3	1500
	MQ1	1	564000000
		1	180000000
		2	88400000
		2	63600000
		3	74500000
		3	97400000
